# Supplementary material
Source: PubMed Central journal article supplement (PMC9523044)
Supplement: 41467_2022_33218_MOESM3_ESM.pdf [file 41467_2022_33218_MOESM3_ESM.pdf]

## **Description of Additional Supplementary Files**

File Name: Supplementary Data 1

Description: Proteome data of human mesenchymal stem cells differentiated into adipocytes and infected with SARS-CoV-2 (24 hpi).

File Name: Supplementary Data 2

Description: Enriched terms of the KEGG and Reactome databases among the differentially expressed proteins comparing mock and SARS-CoV-2 infected fat cells.

File Name: Supplementary Data 3

Description: Reagents and materials used in the study
